1  
2  
3  
4  
5  
6  
7  
8  
9  
10  
11  
12  
13  
14  
15  
16  
17  
18  
19  
20

Geographic distribution of conversion therapy prevalence in Canada

Amrit Tiwana<sup>1¶\*</sup>, Travis Salway<sup>1¶</sup>, Julia Schillaci-Ventura<sup>2&</sup>, Sarah Watt<sup>1&</sup>

<sup>1</sup>Faculty of Health Sciences, Simon Fraser University, Burnaby, British Columbia, Canada

<sup>2</sup>Department of Psychology, Simon Fraser University, Burnaby, British Columbia, Canada

\*Corresponding Author:

Email: [amrit\\_tiwana@sfu.ca](mailto:amrit_tiwana@sfu.ca)

¶These authors made substantial contributions to the analysis and interpretation of data for the work. These authors also drafted the work and approved it for the final version to be published.

&These authors helped draft the work and approved it for the final version to be published.

## 21 **Abstract**

22 Conversion therapy practices (CTPs) are discredited efforts that target lesbian, gay, bisexual,  
23 trans, queer, Two-Spirit, or other (LGBTQ2S+) people and seek to change, deny, or discourage  
24 their sexual orientation, gender identity, and/or gender expression. This study aims to investigate  
25 the prevalence of CTPs across Canadian provinces and territories and identify whether CTP bans  
26 are associated with decreasing prevalence. We analyzed 119 CTPs reported from 31 adults (18+)  
27 in Canada who have direct experience with CTPs, know people who have gone to CTPs, or know  
28 of conversion therapy practitioners by using a 2020 anonymous online survey. Mapping analysis  
29 was conducted using ArcGIS Online. CTP prevalence was compared between  
30 provinces/territories with and without bans using chi-square tests. We found 3 provinces and 11  
31 municipalities had CTP bans. The prevalence of CTPs in provinces/territories with a ban is 2.34  
32 per 1,000,000 population (95% CI 1.65, 3.31). The prevalence of CTPs in  
33 provinces/territories without a ban is 4.13 per 1,000,000 population (95% CI 3.32, 5.14).  
34 Accounting for the underlying population, provinces/territories with the highest prevalence of  
35 CTPs are New Brunswick (6.69), Nova Scotia (6.50), and Saskatchewan (6.37). Findings suggest  
36 only 55% of Canadians are protected under CTP bans. The prevalence of CTPs in  
37 provinces/territories without a ban is 1.76 times greater than in provinces/territories with a ban.  
38 CTPs are occurring in most provinces/territories, with higher prevalence in the west and the  
39 Atlantic. Findings will help inform policymakers and legislators as they are increasingly  
40 acknowledging CTPs as a threat to the health and well-being of LGBTQ2S+ people.

41

42

43

## 44 **Introduction**

45 “Conversion therapy” practices (CTPs) are widely discredited, yet they continue to occur  
46 across the globe, including Canada [1]. CTPs refer to any practice designed to change, deny, or  
47 discourage: one’s feelings of sexual attraction to members of the same gender; lesbian, gay,  
48 bisexual, trans, queer, Two-Spirit, or other (LGBTQ2S+) identity; non-conforming gender  
49 expression; or gender identity that differs from sex at birth [2-3]. These practices come in many  
50 forms and are also sometimes referred to by other names including sexual orientation and gender  
51 identity and expression change efforts (SOGIECE), aversion therapy, reparative therapy, and ex-  
52 gay ministries [4].

53 SOGIECE are not monolithic or clearly delineated practices, given that they can happen  
54 in many forms. In some contexts, a distinction between CTPs and SOGIECE is useful. CTPs are  
55 typically organized (i.e., structured activities) and circumscribed (e.g., a certain number of  
56 sessions with a practitioner); these practices are, metaphorically, only the “tip of the iceberg” [5].  
57 CTPs are underpinned by more prevalent practices including other forms of SOGIECE and  
58 cissexist and heterosexist attitudes. SOGIECE have a similar aim as CTPs, but also includes  
59 practices that are less well-defined and advertised. For example, a conversation between a parent  
60 and a child in which the child is dissuaded from living with or adopting an LGBTQ2S+ identity  
61 constitutes as SOGIECE. Overall, both CTPs and SOGIECE are enabled and condoned by  
62 widespread heterosexism and cissexism in societies [3].

63 CTPs are performed by licensed health care providers (e.g., psychologists, psychiatrists,  
64 and psychotherapists) and unlicensed practitioners [6]. It has also been performed by ex-gay  
65 ministries (e.g., EXODUS) and religious leaders (e.g., pastoral counsellors) [7]. CTP attempts  
66 may also involve parents, government agencies, and school personnel.<sup>6</sup> It may be performed one-

67 on-one in an office or in groups at retreats or conferences [4]. Providers may perform CTPs for  
68 money or for free [4]. CTPs can include the use of aversive stimuli, individual talk therapy,  
69 participation in activities that are typically gendered by social norms and processes (e.g., sports,  
70 hunting, fishing, cooking, playing with dolls, etc.), forced sex, and praying and bible study [6].

## 71 **The Harms of Conversion Therapy**

72         There is no credible scientific research that proves CTPs are psychologically safe or  
73 effective.<sup>8</sup> Many medical and human rights associations (e.g., World Health Organization,  
74 Canadian Psychological Association, Canadian Psychiatric Association, American Medical  
75 Association, American Psychological Association, American Academy of Pediatrics, and  
76 Amnesty International) have denounced and discredited the effectiveness of CTPs [3-4,8-9].  
77 However, due to continuing discrimination and societal bias against LGBTQ2S+ people and  
78 others with non-heterosexual identities/attractions and non-cisgender identities/expressions,  
79 some practitioners continue to provide CTPs, particularly to minors, making them vulnerable to  
80 harms associated with these practices [9].

81         Previous research suggests that CTPs negatively impact and stigmatize LGBTQ2S+  
82 people, and can lead to increased anxiety, depression, self-hatred, post-traumatic stress disorder  
83 (PTSD), and many lifelong psychological and social issues [4,8-10]. According to the Sex Now  
84 2011/12 survey, exposure to SOGIECE among Canadian gay, bisexual, and other sexual  
85 minority men were positively associated with loneliness, regular illicit drug use, suicidal  
86 ideation, and suicide attempt [10].

87         LGBTQ2S+ health disparities are often conceptualized through the minority stress  
88 framework, in which mental health problems found among LGBTQ2S+ people are the result of  
89 chronic stressors stemming from the marginalized social status of these individuals, rather than a

90 function of their identity itself [11-13]. This framework offers some insight into the mechanisms  
91 through which CTPs may exact harm upon people who experience them [14]. Minority stressors  
92 include prejudicial events and conditions that are expressed both interpersonally (e.g., violent  
93 attacks and discrimination) and structurally (e.g., laws allowing the rejection of LGBTQ2S+  
94 people in employment) [15]. SOGIECE can also be conceptualized as a minority stressor  
95 because it promotes cisheteronormativity as the only acceptable way of life and reinforces the  
96 rejection of LGBTQ2S+ identities [15]. Cisheteronormativity refers to “cissexism and  
97 heterosexism which assume cisgender gender identities and heterosexual orientation are more  
98 natural and legitimate than those of LGBTQ2S+ people” [5]. As these stressors (including  
99 SOGIECE) accumulate, they create emotional (e.g., ruminating on negative messages), cognitive  
100 (e.g., feeling negative about oneself and/or hopeless about one’s future), and social (e.g., social  
101 anxiety/avoidance) maladaptive responses, eventually leading to diagnosable conditions like  
102 anxiety or depression [14].

### 103 **Prevalence of Conversion Therapy**

104         According to the survey results from Sex Now 2019 (SN2019), an estimated 50,000  
105 Canadian gay, bisexual, and other sexual minority men have attended CTPs at some point in  
106 their lives [10]. This corresponds to 1 in 10 gay, bisexual, and other sexual minority men (10%)  
107 having reported experiencing CTPs. In addition, the previous Trans PULSE Canada community-  
108 based survey found that 11% of transgender and non-binary people had undergone SOGIECE  
109 [16]. Additionally, results from SN2019 suggest that transgender and non-binary people  
110 experience a higher burden of exposure to CTPs than cisgender people [17].

111         Results from SN2019 did not find a difference in the prevalence of CTPs across  
112 provinces and territories in Canada [10]. However, it did find uneven exposure of CTPs across

113 groups defined by age, gender identity, immigration, and ethnicity [17]. CTPs were even more  
114 common (i.e., more than 10%) among subgroups including youth 15-19 years of age (13%),  
115 immigrants (15%), and racial/ethnic minorities (11-22%) [17]. Besides the annual Sex Now  
116 Surveys and Trans PULSE Canada Survey, no data are available regarding the distribution of  
117 CTPs in Canada. Further, no data are available examining the geospatial patterning of CTPs  
118 across and within different geographic regions of Canada, highlighting the importance of the  
119 current study.

## 120 **Attempts to Ban Conversion Therapy**

121 As of November 11, 2021, five Canadian provinces and territories (Ontario, Nova Scotia,  
122 Prince Edward Island (PEI), Quebec, and Yukon) and dozens of Canadian municipalities  
123 (including Calgary, Edmonton, and Vancouver) have enacted legislative bans on CTPs [18]. On  
124 December 4, 2021, the Canada House of Commons voted unanimously to pass Bill C-4, *an Act*  
125 *to Amend the Criminal Code (conversion therapy)*. Bill C-4 subsequently was passed by the  
126 Senate and received Royal Assent on December 8, 2021. Bill C-4 includes provisions to prohibit  
127 causing a person to undergo CTP for, removing a child from Canada to undergo CTP outside  
128 Canada, and advertising or financially benefiting from CTP. This legislation represents an  
129 important milestone in the government’s commitment to protecting LGBTQ2S+ people. As  
130 policymakers and legislators are increasingly acknowledging CTPs as a threat to the health and  
131 well-being of LGBTQ2S+ people, up-to-date data on the geospatial patterns of CTP prevalence  
132 are urgently needed.

133 Given that CTPs are widely discredited and denounced practices, many conversion  
134 therapy providers do not advertise themselves as “conversion therapists” [19]. Wide  
135 denunciation and steps towards criminalization may have led conversion therapy providers to

136 operate ‘underground’ and advertise their services in covert ways [20]. These providers may not  
137 refer to their services as “conversion therapy” and may instead use vague terms to allude to their  
138 approach to diverse sexual orientations or gender identities (e.g., healing “sexual brokenness”)  
139 [20]. For these reasons, it is challenging to track down the locations where CTPs continue to  
140 operate. Establishing methods and data sources that enable ongoing monitoring of CTPs is  
141 critical in this context.

## 142 **The Purpose of this Research**

143 For this study, data were collected from a small national sample of Canadians who have  
144 direct experience with CTPs, know people who have gone to CTPs, or know of conversion  
145 therapy practitioners in 2020. The goal of the survey was to better understand the nature and  
146 scope of SOGIECE, or CTPs in Canada. The primary objective of this thesis was to estimate the  
147 spatial patterning of prevalent CTPs in Canada.

## 148 **Materials and Methods**

### 149 **Participants**

150 An anonymous online survey using SurveyMonkey was conducted between August 18  
151 and December 2, 2020. The survey was conducted in French and English. The content of the  
152 questionnaire was developed with the help of conversion therapy survivors and people working  
153 to prevent CTPs or reduce the harm associated with CTPs in Canada. To be eligible for the  
154 survey, participants must have: experienced CTPs, nearly experienced CTPs, or know someone  
155 who has experienced CTPs; been 19 years of age or older; and resided in Canada. The protocol  
156 for this study was approved by the Simon Fraser University Research Ethics Board (study  
157 2019s0394).

158 Participants were recruited using various strategies including word-of-mouth (37% of  
159 respondents reported hearing about the survey in this manner), Twitter or Facebook (35%),  
160 LGBTQ2S+ community organizations (15%), and participation in an in-depth interview with the  
161 research team [21] during January-July 2020 (13%). A total of N = 108 individuals entered the  
162 study, of which 19 did not consent to participate and/or were ineligible to participate. In total, N  
163 = 89 completed the entire survey (i.e., responded to the last question). For the present study, a  
164 subset of N = 31 (29%) of those who answered the questions regarding known conversion  
165 therapy providers in Canada were used in the analysis.

## 166 **Measures**

167 Participants were directed to a SurveyMonkey link where they were presented with an  
168 informed consent page regarding the study. Specifically, participants were informed about the  
169 project, who was conducting and funding the survey, the risks, and benefits of the survey, as well  
170 as the eligibility criteria and consent to participate. All participants who completed the survey (N  
171 = 89) provided informed consent before completing the questionnaire. Participants were  
172 informed they could skip any of the questions they did not wish to answer.

173 The survey consisted of six parts: (1) recruitment and category of experience with  
174 conversion therapy; (2a) details about direct SOGIECE experience; (2b) details about knowledge  
175 of SOGIECE; (3) knowledge of conversion therapy practitioners; (4) legislative action against  
176 conversion therapy; and (5) social-demographic characteristics. To determine eligibility,  
177 participants were asked: “How would you describe your experience with conversion therapy  
178 (i.e., structured activity to deny or suppress your LGBTQ2 identity)? Please check all that  
179 apply.” Respondents were directed to part (3) of the survey, “knowledge of conversion therapy  
180 practitioners”, if they selected “I know of conversion therapy practitioners in Canada” or “I



181 know that conversion therapy is happening in Canada”. They were then asked to list  
182 municipalities, provinces, and territories where these CTPs had taken place, and identify whether  
183 the practice was ongoing or historical (i.e., happened in the past).

184 At the end of the study, all participants were asked to provide social demographic  
185 information including their age, place of residence, and racial/ethnic group. Finally, participants  
186 were presented with a debriefing letter which included an option to input their email address to  
187 learn more about SOGIECE and CTPs, and a list of LBTQ2S+-affirming mental health supports  
188 for any participants who may have experienced distress because of the recalling of traumatic  
189 experience(s).

## 190 **Analyses**

191 To analyze the spatial patterning, maps were created using ArcGIS Online. Participants  
192 who answered part (3) of the survey, ‘knowledge of conversion therapy practitioners’ (N = 31)  
193 were used in the mapping analysis. The dataset contained a total of 127 reports of 119 ongoing  
194 and 8 historical CTPs. Because names/addresses of CTPs were not collected, it was not possible  
195 to determine whether the 127 reports are mutually exclusive. Municipal and provincial/territorial  
196 spatial units were used in the analysis. Primary analysis focused only on ongoing reports,  
197 however additional maps were created combining ongoing and historical reports (see Appendix  
198 A and B). Thus, the primary analysis dataset consisted of 119 rows (i.e., observations) and 2  
199 columns (reported municipalities and provinces/territories). These 119 CTPs were identified in  
200 53 different municipalities (with 1-7 CTPs per municipality) and 8 different provinces/territories  
201 (with 1-28 CTPs per province/territory). 20 out of the 119 reports identified CTPs in  
202 provinces/territories but did not specify a municipality.

203 Three maps were created: (1) municipal, provincial and territorial CTP bans in Canada,  
204 (2) a heat map of ongoing CTPs (using municipal spatial unit), and (3) a choropleth map of CTP  
205 prevalence by province/territory (calculated as reports of ongoing CTPs divided by 1,000,000  
206 population per province/territory). Provinces/territories with numerators less than 5 were not  
207 interpreted due to statistical instability. As of November 2021, data on current legislative bans  
208 were obtained from the Legislation Map on the No Conversion Canada website.<sup>18</sup> The “heat  
209 map” function in ArcGIS Online was applied to identify hot spots of CTPs across the nation. The  
210 map of the bans and the heat map were compared to assess the association between ongoing  
211 CTPs and existing bans. We also calculated the prevalence of CTPs in provinces/territories with  
212 bans and the prevalence of CTPs in provinces/territories without bans (as of the time of the  
213 survey, August 2020) using chi-square tests, to assess differences in prevalence between these  
214 two sets of jurisdictions. 95% confidence intervals were added to these measures. The 2016  
215 Census cartographic boundary file by Statistics Canada was used to estimate the population per  
216 municipality, province, and territory for the choropleth map [22].

## 217 **Results**

218 The age of respondents ranged from 18 to 65+ with 70% of participants under the age of  
219 45. The majority of the respondents resided in the most populous Canadian provinces, i.e.,  
220 British Columbia, Ontario, and Alberta. The majority of the sample identified with a white  
221 ethnic/racial group (93.33%), followed by East Asian, Black, and mixed ethnic/racial groups. A  
222 plurality of respondents identified as cis men (38.7%) and gay (41.9%). However, reported  
223 gender identity and sexual orientation were diverse, as shown in Table 1.

224

225  
226

**Table 1. Demographic characteristics of participants who report knowing ongoing or historical conversion therapy practices in Canada, (N = 31).**

| <b>Demographic Characteristics</b>                |                         | <b>Total<br/>n (%)</b> |
|---------------------------------------------------|-------------------------|------------------------|
| <b>Age<br/>(years)</b>                            | 18-24                   | 6 (20)                 |
|                                                   | 25-34                   | 9 (30)                 |
|                                                   | 35-44                   | 7 (22.6)               |
|                                                   | 45-54                   | 3 (10)                 |
|                                                   | 55-64                   | 2 (6.7)                |
|                                                   | 65+                     | 1 (3.3)                |
|                                                   | N/A                     | 3 (10)                 |
| <b>Area of Residence<br/>(Province/Territory)</b> | British Columbia        | 8 (26.7)               |
|                                                   | Alberta                 | 4 (13.3)               |
|                                                   | Saskatchewan            | 0                      |
|                                                   | Manitoba                | 0                      |
|                                                   | Ontario                 | 9 (30)                 |
|                                                   | Quebec                  | 3 (10)                 |
|                                                   | Atlantic<br>Territories | 3 (10)                 |
|                                                   | N/A                     | 0                      |
| <b>Race/Ethnicity</b>                             | White                   | 19 (63.3)              |
|                                                   | Black                   | 2 (6.7)                |
|                                                   | East Asian              | 3 (10)                 |
|                                                   | Indigenous              | 1 (3.3)                |
|                                                   | Mixed                   | 2 (6.7)                |
|                                                   | N/A                     | 3 (10)                 |
| <b>Gender Identity*</b>                           | Cis Men                 | 12 (38.7)              |
|                                                   | Cis Women               | 5 (16.1)               |
|                                                   | Trans Men               | 5 (16.1)               |
|                                                   | Trans Women             | 2 (6.5)                |
|                                                   | Non-Binary              | 5 (16.1)               |
|                                                   | Genderqueer             | 3 (9.7)                |
|                                                   | Genderfluid             | 2 (6.5)                |
| <b>Sexual Orientation*</b>                        | Gay                     | 13 (41.9)              |
|                                                   | Queer                   | 12 (38.7)              |
|                                                   | Lesbian                 | 6 (19.4)               |
|                                                   | Bisexual                | 4 (12.9)               |
|                                                   | Pansexual               | 4 (12.9)               |
|                                                   | Asexual                 | 2 (6.5)                |
|                                                   | Heterosexual/straight   | 4 (12.9)               |
|                                                   | Queer Stone Butch       | 1 (3.2)                |

227 *Note.* N/A refers to “not available” meaning the respondent did not fill out the demographic  
 228 characteristic of interest. \*Participants are permitted to select more than one option.  
 229

230 Data collection took place between August and December 2020, therefore legislative  
 231 bans passed on CTPs after August 2020 are not considered in the results. Then, only three  
 232 provinces (Ontario, PEI, and Nova Scotia) and eleven municipalities had legislative bans in  
 233 place. 19,459,172 out of 35,151,728 Canadians were protected under legislative bans as of  
 234 August 2020, which corresponds to 55.1% of the total Canadian population (Table 2). Fig 1 is a  
 235 map visualizing the bans passed as of August 2020.

236

237 **Table 2. List of the dates of legislative bans passed on conversion therapy practices (CTPs)**  
 238 **in Canadian municipalities, provinces, and territories.**

| <b>Municipality</b>          | <b>Province/Territory</b> | <b>Date of Legislative Bans on CTPs</b> | <b>Canadian Population, 2016</b> | <b>Cumulative Percentage of Canadian Population Protected Under Legislative Ban</b> |
|------------------------------|---------------------------|-----------------------------------------|----------------------------------|-------------------------------------------------------------------------------------|
|                              | Ontario                   | 2015                                    | 13,448,494                       | 38.3%                                                                               |
| Vancouver                    | British Columbia          | June 2018                               | 631,486                          | 40.1%                                                                               |
|                              | Nova Scotia               | 2018                                    | 923,598                          | 42.7%                                                                               |
| Montreal                     | Quebec                    | August 2019                             | 1,704,694                        | 47.5%                                                                               |
| Strathcona County            | Alberta                   | September 2019                          | 98,044                           | 47.8%                                                                               |
| Edmonton                     | Alberta                   | December 2019                           | 932,546                          | 50.5%                                                                               |
| St. Albert                   | Alberta                   | December 2019                           | 65,589                           | 50.7%                                                                               |
|                              | Prince Edward Island      | 2019                                    | 142,907                          | 51.1%                                                                               |
| Wood Buffalo (Fort McMurray) | Alberta                   | January 2020                            | 71,589                           | 51.3%                                                                               |

|                                                                                                                                        |                  |               |           |       |
|----------------------------------------------------------------------------------------------------------------------------------------|------------------|---------------|-----------|-------|
| Saint John                                                                                                                             | New Brunswick    | January 2020  | 67,575    | 51.5% |
| Rocky Mountain House                                                                                                                   | Alberta          | February 2020 | 6,635     | 51.5% |
| Calgary                                                                                                                                | Alberta          | March 2020    | 1,239,220 | 51.5% |
| Spruce Grove                                                                                                                           | Alberta          | April 2020    | 34,066    | 55.0% |
| Lethbridge                                                                                                                             | Alberta          | July 2020     | 92,729    | 55.1% |
| <b>Data collection occurred August-December 2020. Therefore, the following legislative bans are not accounted for in the analysis.</b> |                  |               |           |       |
| Beaumont                                                                                                                               | Alberta          | November 2020 | 17,396    | 55.4% |
|                                                                                                                                        | Yukon            | November 2020 | 35,874    | 55.4% |
|                                                                                                                                        | Quebec           | December 2020 | 8,164,361 | 78.1% |
| Kingston                                                                                                                               | Ontario          | January 2021  | 123,798   | 79.1% |
| Saskatoon                                                                                                                              | Saskatchewan     | February 2021 | 246,376   | 79.8% |
| Nanaimo                                                                                                                                | British Columbia | March 2021    | 90,504    | 80.0% |
| Fort Saskatchewan                                                                                                                      | Alberta          | July 2021     | 24,149    | 80.1% |
| Strathmore                                                                                                                             | Alberta          | July 2021     | 13,756    | 80.2% |
| Thunder Bay                                                                                                                            | Ontario          | July 2021     | 107,909   | 80.5% |
| Regina                                                                                                                                 | Saskatchewan     | August 2021   | 215,106   | 81.1% |

239 *Note.* Data collection started in August 2020 and ended in December 2020. Legislative bans  
240 passed after August 2020 are not accounted for in the analysis.

241  
242 **Fig 1. Municipal, provincial, and territorial legislative bans on conversion therapy**  
243 **practices (CTPs) in Canada as of August 2020.**

244  
245 31 out of the 89 participants who answered part (3) of the survey, ‘knowledge of  
246 conversion therapy practitioners’ reported 119 CTPs (reports per participant ranged from 1-31,  
247 mean of 4). 20 (16.8%) locations were reported at the provincial/territorial level and 99 (83.2%)  
248 locations were reported at the municipal level. The prevalence of ongoing CTPs in provinces and

249 territories with bans as of August 2020 is 2.34 per 1,000,000 population (95% CI 1.65, 3.31)  
 250 (Table 3). The prevalence of ongoing CTPs in provinces and territories without bans as of  
 251 August 2020 is 4.13 per 1,000,000 population (95% CI 3.32, 5.14). No data were reported  
 252 regarding CTPs in the Northwest Territories and Nunavut and therefore are not included in the  
 253 calculations.

254

255 **Table 3. Prevalence of ongoing conversion therapy practices (CTPs) in Canadian provinces**  
 256 **and territories with bans versus without bans at the provincial level.**

|                                                                                                         | <b>Number of practices identified (numerator)</b> | <b>Prevalence (CTPs per 1,000,000) (95% confidence interval)</b> |
|---------------------------------------------------------------------------------------------------------|---------------------------------------------------|------------------------------------------------------------------|
| Ongoing CTPs per 1,000,000 population in provinces/territories <u>WITH</u> bans (as of August 2020):    | 34                                                | 2.34<br>(1.65, 3.31)                                             |
| Ongoing CTPs per 1,000,000 population in provinces/territories <u>WITHOUT</u> bans (as of August 2020): | 85                                                | 4.13<br>(3.32, 5.14)                                             |

257 *Note.* No data were reported regarding CTPs in the Northwest Territories and Nunavut.  
 258 Therefore, Nunavut and the Northwest Territories are not included in the calculations above.

259

260 A heat map was created to examine a more granular prevalence of reported ongoing  
 261 CTPs in Canada using count data without adjustment of the underlying population. We used the  
 262 municipal spatial unit for the heat map because data containing just the reported  
 263 province/territory were misleading. As shown in Fig 2, ongoing CTPs were identified across the  
 264 nation. The majority of the cases and hotspots are clustered around the South of Canada. This is  
 265 no surprise given that two-thirds (66%) of the Canadian population lives within 100 kilometres

266 of the southern Canada-United States (US) border, an area that represents approximately 4% of  
267 Canadian land [23].

268

269 **Fig 2. A heat map of the prevalence of reported ongoing conversion therapy practices**  
270 **(CTPs) in Canada using count data (N = 99)**

271 *Note.* No data were reported regarding the prevalence of CTPs in the Northwest Territories and  
272 Nunavut.

273

274 Fig 3 displays the prevalence of CTPs divided by 1,000,000 population per  
275 province/territory. When accounting for the underlying population, the provinces and territories  
276 with the highest prevalence of reported ongoing CTPs are New Brunswick (6.69), Nova Scotia  
277 (6.50), and Saskatchewan (6.37). Provinces and territories with moderate prevalence include  
278 British Columbia (6.08), Alberta (5.90), and Manitoba (3.91), Provinces with lower prevalence  
279 include Ontario (2.01), and Quebec (1.59). The following provinces/territories had <5 reports of  
280 conversion practices and therefore are not further interpreted: Yukon (55.75), PEI (7.00), and  
281 Newfoundland and Labrador (1.92). No data were reported regarding the prevalence of ongoing  
282 CTPs in the Northwest Territories and Nunavut.

283

284 **Fig 3. Prevalence of ongoing reported conversion therapy practices (CTPs) divided by**  
285 **1,000,000 population per province/territory (N = 119)**

286 *Note.* \*Province/territory has implemented a ban as of August 2020. Please exercise caution in  
287 interpreting estimates from the following provinces/territories with numerators <5: Yukon (YT)  
288 (55.75), Prince Edward Island (PEI) (7.00), Newfoundland and Labrador (NL) (1.92). No data  
289 were reported regarding the prevalence of CTPs in the Northwest Territories and Nunavut.

290

## 291 **Discussion**

292 This non-probabilistic survey of adults in Canada with direct or indirect experiences of CTPs  
293 provides early insights on the spatial patterning of the prevalence of CTPs in Canada. Findings  
294 suggest only 19,459,172 out of 35,151,728 Canadians were protected under the legislation on  
295 CTPs at the time of the study. This number corresponds to 55.1% of the total Canadian  
296 population protected. Further, CTPs are occurring in the majority of Canadian provinces and  
297 territories, with higher prevalence in the west and the Atlantic.

298 These findings are similar to the results of a study that examined exposure to psychological  
299 attempts to change a person's gender identity from transgender to cisgender (PACGI) among  
300 transgender people in the US, lifetime and between the years 2010 and 2015, by US state [24].  
301 The findings from this study suggested that practices continue to occur in every US state as  
302 recently as the period 2010 to 2015, despite major US medical organizations identifying PACGI  
303 as ineffective [24] and legislative bans passed in 20 states and more than 100 municipalities in  
304 the US [25]. As with the Canadian map (Fig 3), The PACGI study found an elevated prevalence  
305 of PACGI in western jurisdictions of the US.



306           The prevalence of CTP in provinces/territories without legislative bans as of August 2020  
307 was approximately 1.76 times greater than the prevalence in provinces/territories with bans  
308 (Ontario, PEI, Nova Scotia). While this is encouraging, there are several reasons to be cautious  
309 in interpreting this finding. The data used in this analysis does not allow us to control for other  
310 factors happening within the provinces/territories with bans that have deterred CTPs (i.e.,  
311 confounding). For example, we did not account for whether there might have been an effect of  
312 municipal bans. Additionally, we cannot know from these data whether bans are enforced. We  
313 cannot say whether legislative bans caused CTPs to shut down because we do not know whether  
314 these services started or stopped practicing before or after the bans. In other words, we cannot  
315 assess the temporal relationship between time and practices taking place. For these reasons, the  
316 association between the lower prevalence found in provinces/territories with bans and higher  
317 prevalence found in provinces/territories without bans may not be real.

## 318 **Limitations**

319           First, the sample size was small. The prevalence calculated may be unstable because it is  
320 based upon only a small number of reports extrapolated over a large population [26]. Second, the  
321 sample largely came from LGBTQ2S+ community organizations or conversion therapy survivors  
322 and thus constitutes a non-probabilistic subset of the total target population (e.g., all people in  
323 Canada). Evidence shows that non-probability surveys tend to overrepresent employed, high-  
324 income-earning, and gay-identified sexual minorities [27]. Third, since the survey was developed  
325 in Vancouver, British Columbia, it is likely more CTPs were reported in this region compared to  
326 other parts of Canada, which is reflected in the geographic patterning of the data. Fourth, the  
327 language of the item used to measure conversion therapy may not encompass people's

328 experiences. For example, people may interpret their experience as more of a form of SOGIECE  
329 rather than conversion therapy and thus may choose to not report the practice. Lastly, we cannot  
330 assess legislation impacts and whether it reduced the prevalence of CTPs because we do not  
331 know if the identified practice took place before or after legislation was passed.

## 332 **Future Research**

333 Given that CTPs persist across Canada, we recommend that the following actions be taken in  
334 collaboration with conversion therapy survivors, community organizations and multiple levels of  
335 government. The results of this study should be confirmed and repeated with a larger sample size  
336 to ensure underscore representativeness. One idea to deal with the small sample size problem is  
337 to bring additional years of data into the analysis to increase the size of the numerator [26]. In  
338 addition to this, recruitment methods should be expanded to make interpretations more  
339 generalizable to the Canadian population. There must be continued efforts to monitor how  
340 conversion therapy practitioners continue to operate, even in places where bans have been  
341 implemented. Monitoring where CTPs continue to occur will help keep legislators accountable  
342 and identify where supportive LGBTQ2S+-affirming environments are most needed.

## 343 **Conclusion**

344 The ongoing occurrence of CTPs is a serious public health issue impacting the health and  
345 well-being of thousands of LGBTQ2S+ Canadians. Findings from this study should be taken into  
346 consideration as Bill C-4 is implemented and enforced in Canada. Combined with legislative ban  
347 efforts, the Canadian government should work to deter SOGIECE and CTPs, while encouraging  
348 LGBTQ2S+-affirming environments by supporting gay-straight alliances, pride flags, and other

349 interventions that remind LGBTQ2S+ people that their identities are valid [3]. Finally, education  
350 is required to reduce the prejudice of LGBTQ2S+ people to ultimately put an end to CTPs.

351

## 352 **Acknowledgments**

353 My research team is grateful to the following individuals who provided insight and feedback on  
354 the questionnaire drafts and/or who helped to promote the survey: A.J. Lowik, Beth Carlson-  
355 Malena, David Kinitz, Elisabeth Dromer, Geron Malbas, Keith Murray, Kiffer Card, Michael  
356 Kwag, Nicholas Schiavo, and Trevor Goodyear.

357

## 358 **References**

- 359 1. Bishop A: The Global Reach of So-Called Conversion Therapy. OutRight Action  
360 International. 2019. Available at [https://outrightinternational.org/reports/global-reach-so-](https://outrightinternational.org/reports/global-reach-so-called-conversion-therapy)  
361 [called-conversion-therapy](https://outrightinternational.org/reports/global-reach-so-called-conversion-therapy) Accessed February 25, 2022.
- 362 2. Ashley F: Model law – prohibiting reparative practices. SSRN Electronic Journal. 2019.  
363 Available at <https://doi.org/10.2139/ssrn.3398402> Accessed February 25, 2022.
- 364 3. Centre for Gender and Sexual Health Equity. Ending conversion therapy in Canada:  
365 Survivors, community leaders, researchers, and allies address the current and future states of  
366 sexual orientation and gender identity and expression change efforts. 2020 Feb 18. Available  
367 at [https://lgbtqhealth.ca/collaboration/docs/SOGIECE-Dialogue-Report-FINAL-](https://lgbtqhealth.ca/collaboration/docs/SOGIECE-Dialogue-Report-FINAL-18Feb2020.pdf)  
368 [18Feb2020.pdf](https://lgbtqhealth.ca/collaboration/docs/SOGIECE-Dialogue-Report-FINAL-18Feb2020.pdf) Accessed February 25, 2022.

- 369 4. The Trevor Project. About Conversion Therapy. 2020 Dec 20. Available at  
370 <https://www.thetrevorproject.org/get-involved/trevor-advocacy/50-bills-50-states/about->  
371 [conversion-therapy/](https://www.thetrevorproject.org/get-involved/trevor-advocacy/50-bills-50-states/about-conversion-therapy/) Accessed February 25, 2022.
- 372 5. Kinitz DJ, Goodyear T, Dromer E, et al.: “Conversion therapy” experiences in their social  
373 contexts: A qualitative study of sexual orientation and gender identity and expression change  
374 efforts in Canada: Les Expériences de “thérapie de conversion” dans leur contexte social:  
375 Une étude qualitative des efforts de changement de l’orientation sexuelle, de l’identité de  
376 genre et de l’expression de genre au Canada. *Can J Psychiatry* 2021;070674372110304.
- 377 6. Adamson TM, Wallach S, Garner A, et al.: The global state of conversion therapy - a  
378 preliminary report and current Evidence Brief. 2020. Available at  
379 <https://doi.org/10.31235/osf.io/9ew78> Accessed February 25, 2022.
- 380 7. Karten EY, Wade JC: Sexual orientation change efforts in men: A client perspective. *J Mens*  
381 *Stud* 2010;18:84–102.
- 382 8. Wells K: Conversion therapy in Canada: A guide for legislative action (Revised Edition).  
383 MacEwan University. 2020. Available at  
384 <https://www.familleslgbt.org/documents/pdf/ConversionTherapy.pdf> Accessed February 25,  
385 2022.
- 386 9. The Human Rights Campaign. The lies and dangers of "conversion therapy". Available at  
387 <https://www.hrc.org/resources/the-lies-and-dangers-of-reparative-therapy> Accessed February  
388 25, 2022.
- 389 10. Salway T, Ferlatte O, Gesink D, Lachowsky NJ: Prevalence of exposure to sexual orientation  
390 change efforts and associated sociodemographic characteristics and psychosocial health  
391 outcomes among Canadian Sexual Minority men. *Can J Psychiatry* 2020;65:502–9.

- 392 11. Green AE, Price-Feeney M, Dorison SH, Pick CJ: Self-reported conversion efforts and  
393 suicidality among US LGBTQ youths and young adults, 2018. *Am J Public Health*  
394 2020;110:1221–7.
- 395 12. Meyer IH: Prejudice, social stress, and Mental Health in lesbian, gay, and bisexual  
396 populations: Conceptual issues and research evidence. *Psychol Bull* 2003;129:674–97.
- 397 13. Rich AJ, Salway T, Scheim A, Poteat T: Sexual minority stress theory: Remembering and  
398 honoring the work of Virginia brooks. *LGBT Health*. 2020;7:124–7.
- 399 14. Hatzenbuehler ML: How does sexual minority stigma “get under the skin”? A psychological  
400 mediation framework. *Psychol Bull* 2009;135:707–30.
- 401 15. Blosnich JR, Henderson ER, Coulter RW et al.: Sexual orientation change efforts, adverse  
402 childhood experiences, and suicide ideation and attempt among sexual minority adults,  
403 United States, 2016–2018. *Am J Public Health* 2020;110:1024–30.
- 404 16. The Trans PULSE Canada Team. QuickStat #1 - Conversion Therapy. 2019 Dec 12.  
405 Available from <https://transpulsecanada.ca/results/quickstat-1-conversion-therapy/>.
- 406 17. Salway T, Juwono S, Klassen B et al.: Experiences with sexual orientation and gender  
407 identity conversion therapy practices among sexual minority men in Canada, 2019–2020.  
408 *PLoS One* 2021;16:e0252539.
- 409 18. Wells K: Legislation Map. No Conversion Canada. Available from  
410 <https://www.noconversioncanada.com/legislation-map> Accessed February 25, 2022.
- 411 19. Brush J: Conversion Ministries and Ex-Gay Ministries. Ohio Psychological Association.  
412 2021 Jan 29. Available at [https://ohpsych.org/news/549803/Conversion-Ministries-and-Ex-](https://ohpsych.org/news/549803/Conversion-Ministries-and-Ex-Gay-Ministries.htm)  
413 [Gay-Ministries.htm](https://ohpsych.org/news/549803/Conversion-Ministries-and-Ex-Gay-Ministries.htm) Accessed February 25, 2022.

- 414 20. Tiwana A: Identifying harmful “conversion therapy” practices in all their forms.  
415 MindMapBC. 2021 Oct 2. Available at [https://www.mindmapbc.ca/articles/identifying-](https://www.mindmapbc.ca/articles/identifying-harmful-conversion-therapy-practices-in-all-its-forms/)  
416 [harmful-conversion-therapy-practices-in-all-its-forms/](https://www.mindmapbc.ca/articles/identifying-harmful-conversion-therapy-practices-in-all-its-forms/) Accessed February 25, 2022.
- 417 21. Goodyear T, Kinitz DJ, Dromer E, et al: “They want you to kill your inner queer but  
418 somehow leave the human alive”: Delineating the impacts of sexual orientation and gender  
419 identity and expression change efforts. *J Sex Res* 2021;1–11.
- 420 22. Statistics Canada. 2016 Census Boundary Files. 2019 Nov 19. Available at  
421 [https://www12.statcan.gc.ca/census-recensement/2011/geo/bound-limit/bound-limit-2016-](https://www12.statcan.gc.ca/census-recensement/2011/geo/bound-limit/bound-limit-2016-eng.cfm)  
422 [eng.cfm](https://www12.statcan.gc.ca/census-recensement/2011/geo/bound-limit/bound-limit-2016-eng.cfm) Accessed February 25, 2022.
- 423 23. Statistics Canada. The Daily – Population size and growth in Canada. 2017 Feb 10. Available  
424 at [https://www150.statcan.gc.ca/n1/en/daily-quotidien/170208/dq170208a-](https://www150.statcan.gc.ca/n1/en/daily-quotidien/170208/dq170208a-eng.pdf?st=a9W4TKsD)  
425 [eng.pdf?st=a9W4TKsD](https://www150.statcan.gc.ca/n1/en/daily-quotidien/170208/dq170208a-eng.pdf?st=a9W4TKsD) Accessed February 25, 2022.
- 426 24. Turban JL, King D, Reisner SL, Keuroghlian AS: Psychological attempts to change a  
427 person’s gender identity from transgender to cisgender: Estimated prevalence across US  
428 states, 2015. *Am J Public Health* 2019;109:1452–4.
- 429 25. Born Perfect. Conversion Therapy Bans by U.S. State. 2021 Oct 8. Available at  
430 <https://bornperfect.org/facts/conversion-therapy-bans-by-state/> Accessed February 25, 2022.
- 431 26. Green C: Geographic Information Systems and Public Health: Benefits and Challenges.  
432 *National Collaborating Centre for Infectious Diseases* 2012;37,1–12.
- 433 27. Salway TJ, Morgan J, Ferlatte O, et al.: A systematic review of characteristics of  
434 nonprobability community venue samples of sexual minority individuals and associated  
435 methods for assessing selection bias. *LGBT Health* 2019;6:205–15.
- 436

437 **Supporting Information**

438 **S1 Fig. Sensitivity analysis: heat map of the prevalence of reported ongoing and historical**  
439 **conversion therapy practices (CTPs) in Canada using Count Data (N = 106)**

440 *Note.* No data were reported regarding the prevalence of CTPs in the Northwest Territories and  
441 Nunavut.

442 **S2 Fig. Sensitivity analysis: prevalence of ongoing and historical reported conversion**  
443 **therapy practices (CTPs) divided by 1,000,000 population per province/territory (N = 127)**

444 *Note.* \*Province/territory has implemented a ban as of August 2020. Please exercise caution in  
445 interpreting estimates from the following provinces/territories with numerators <5:  
446 Newfoundland and Labrador (1.92), Prince Edward Island (7.00), and Yukon (55.75). No data  
447 were reported regarding the prevalence of CTPs in the Northwest Territories and Nunavut.

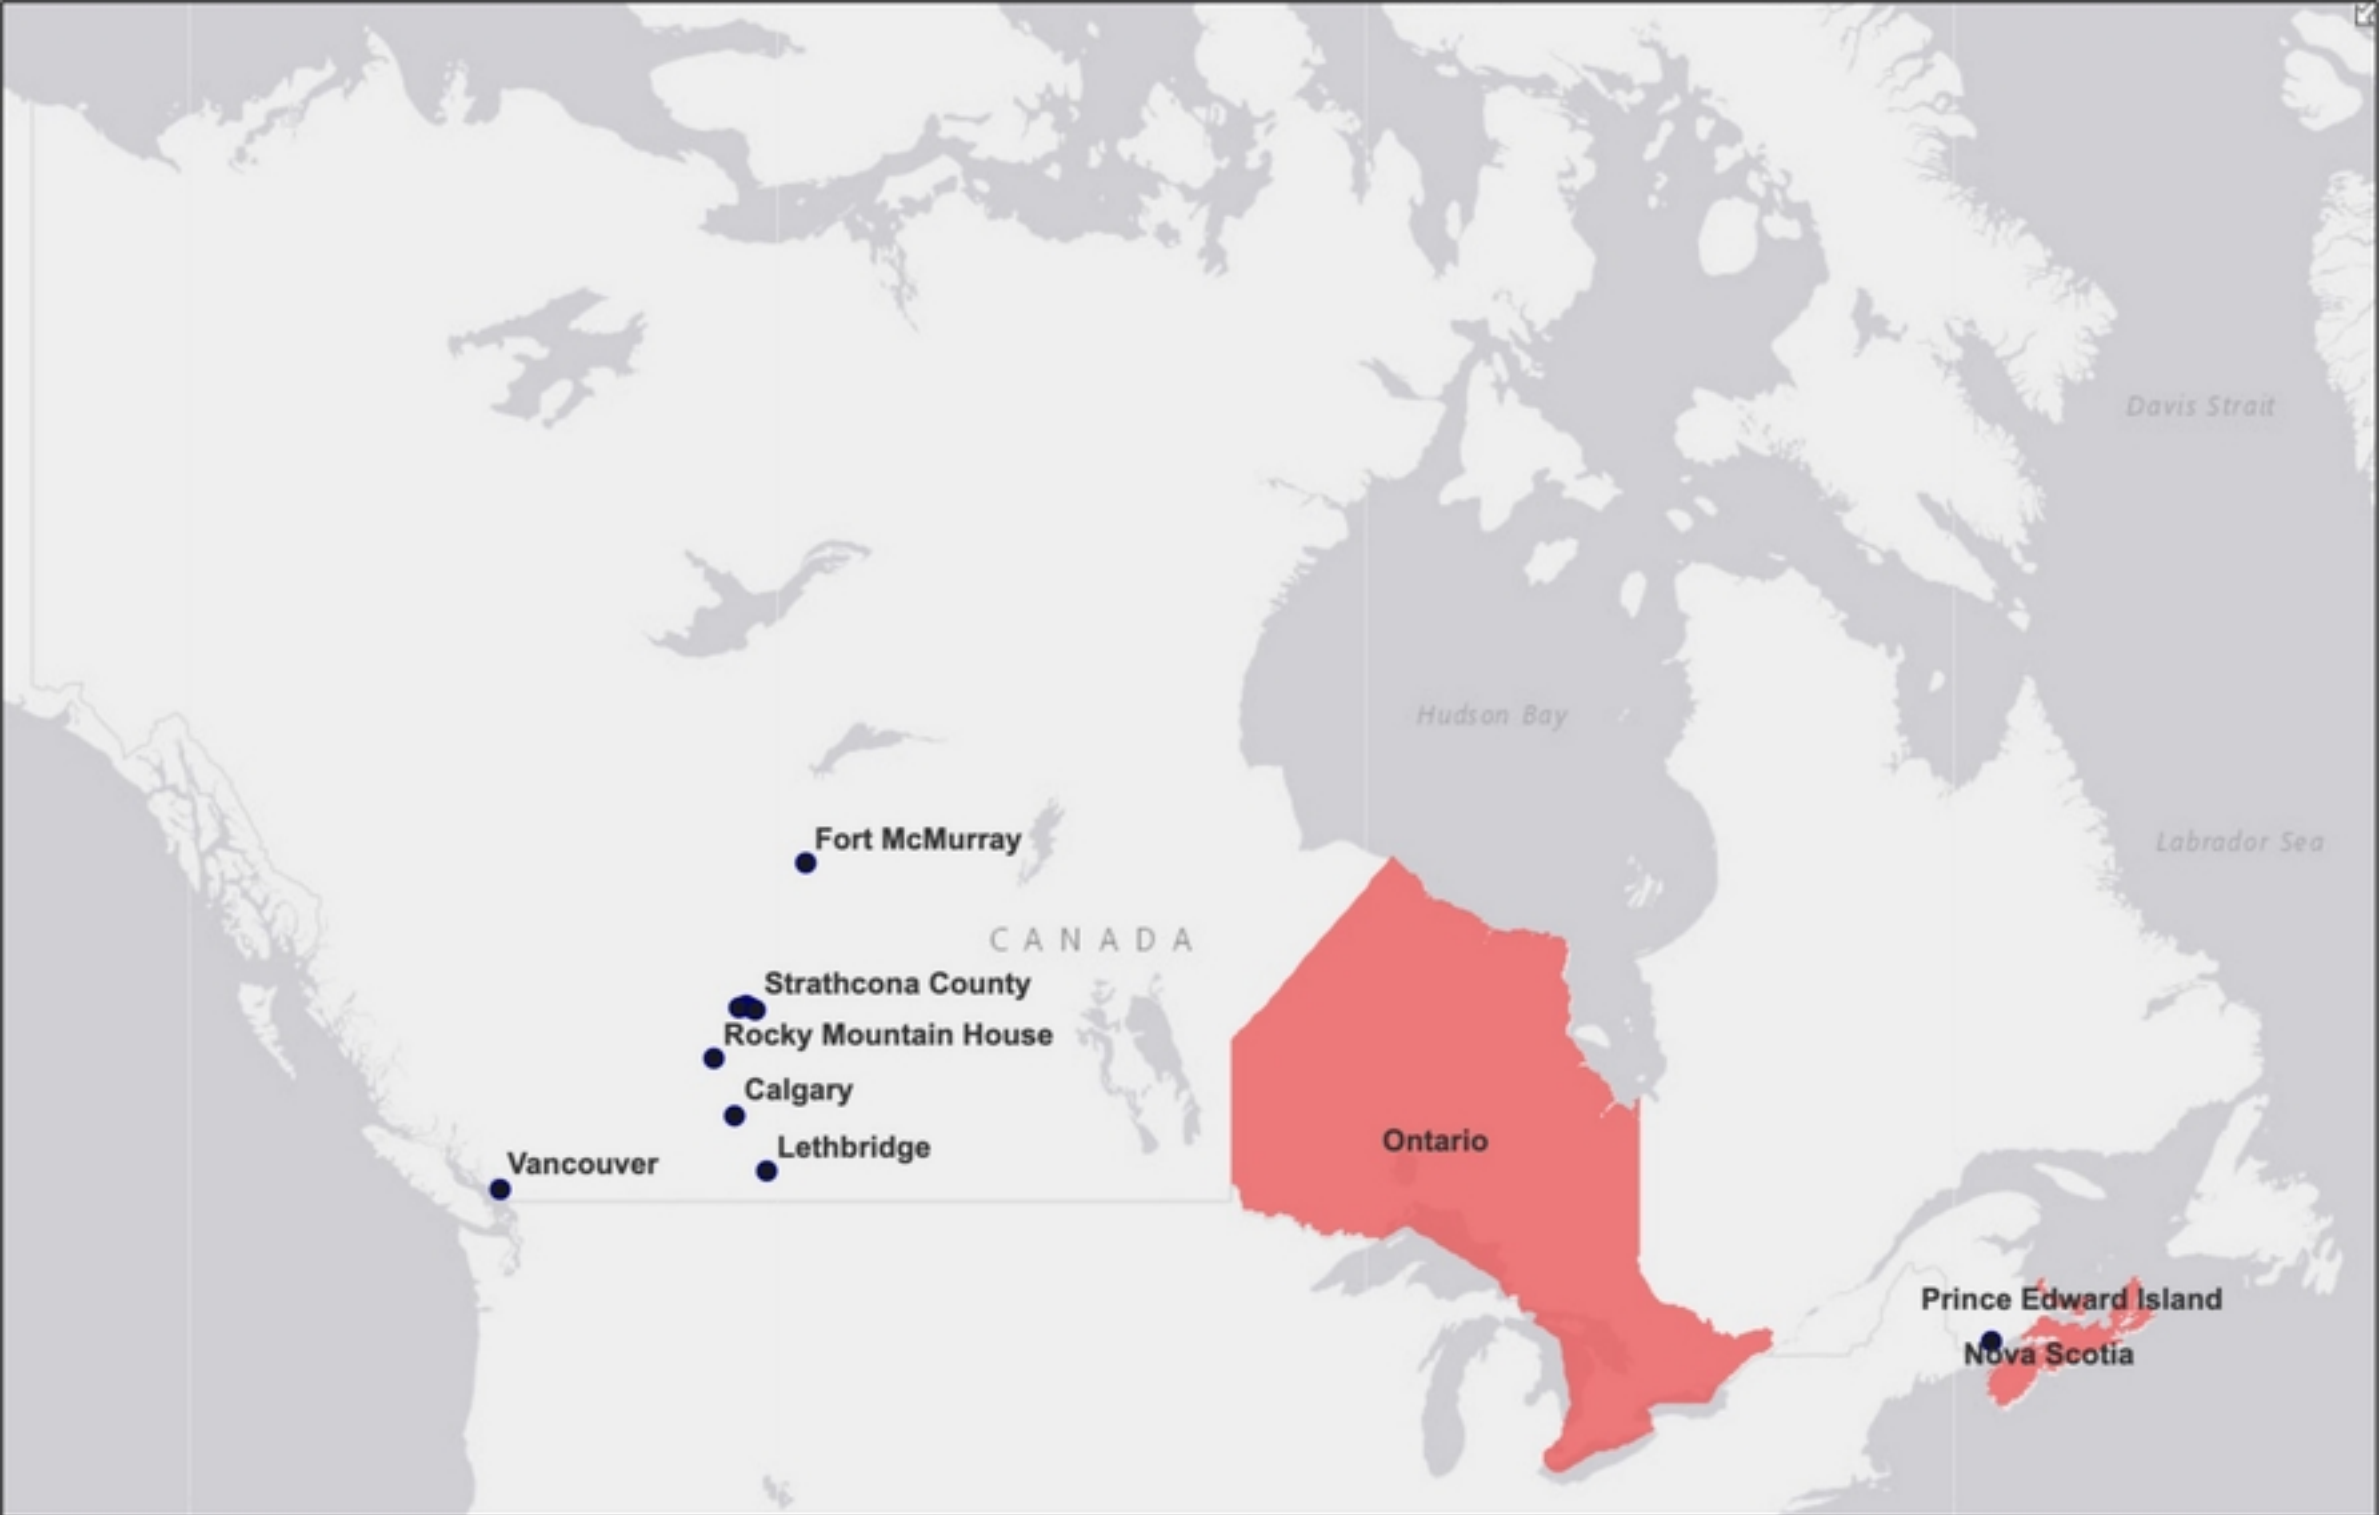

Fig 1



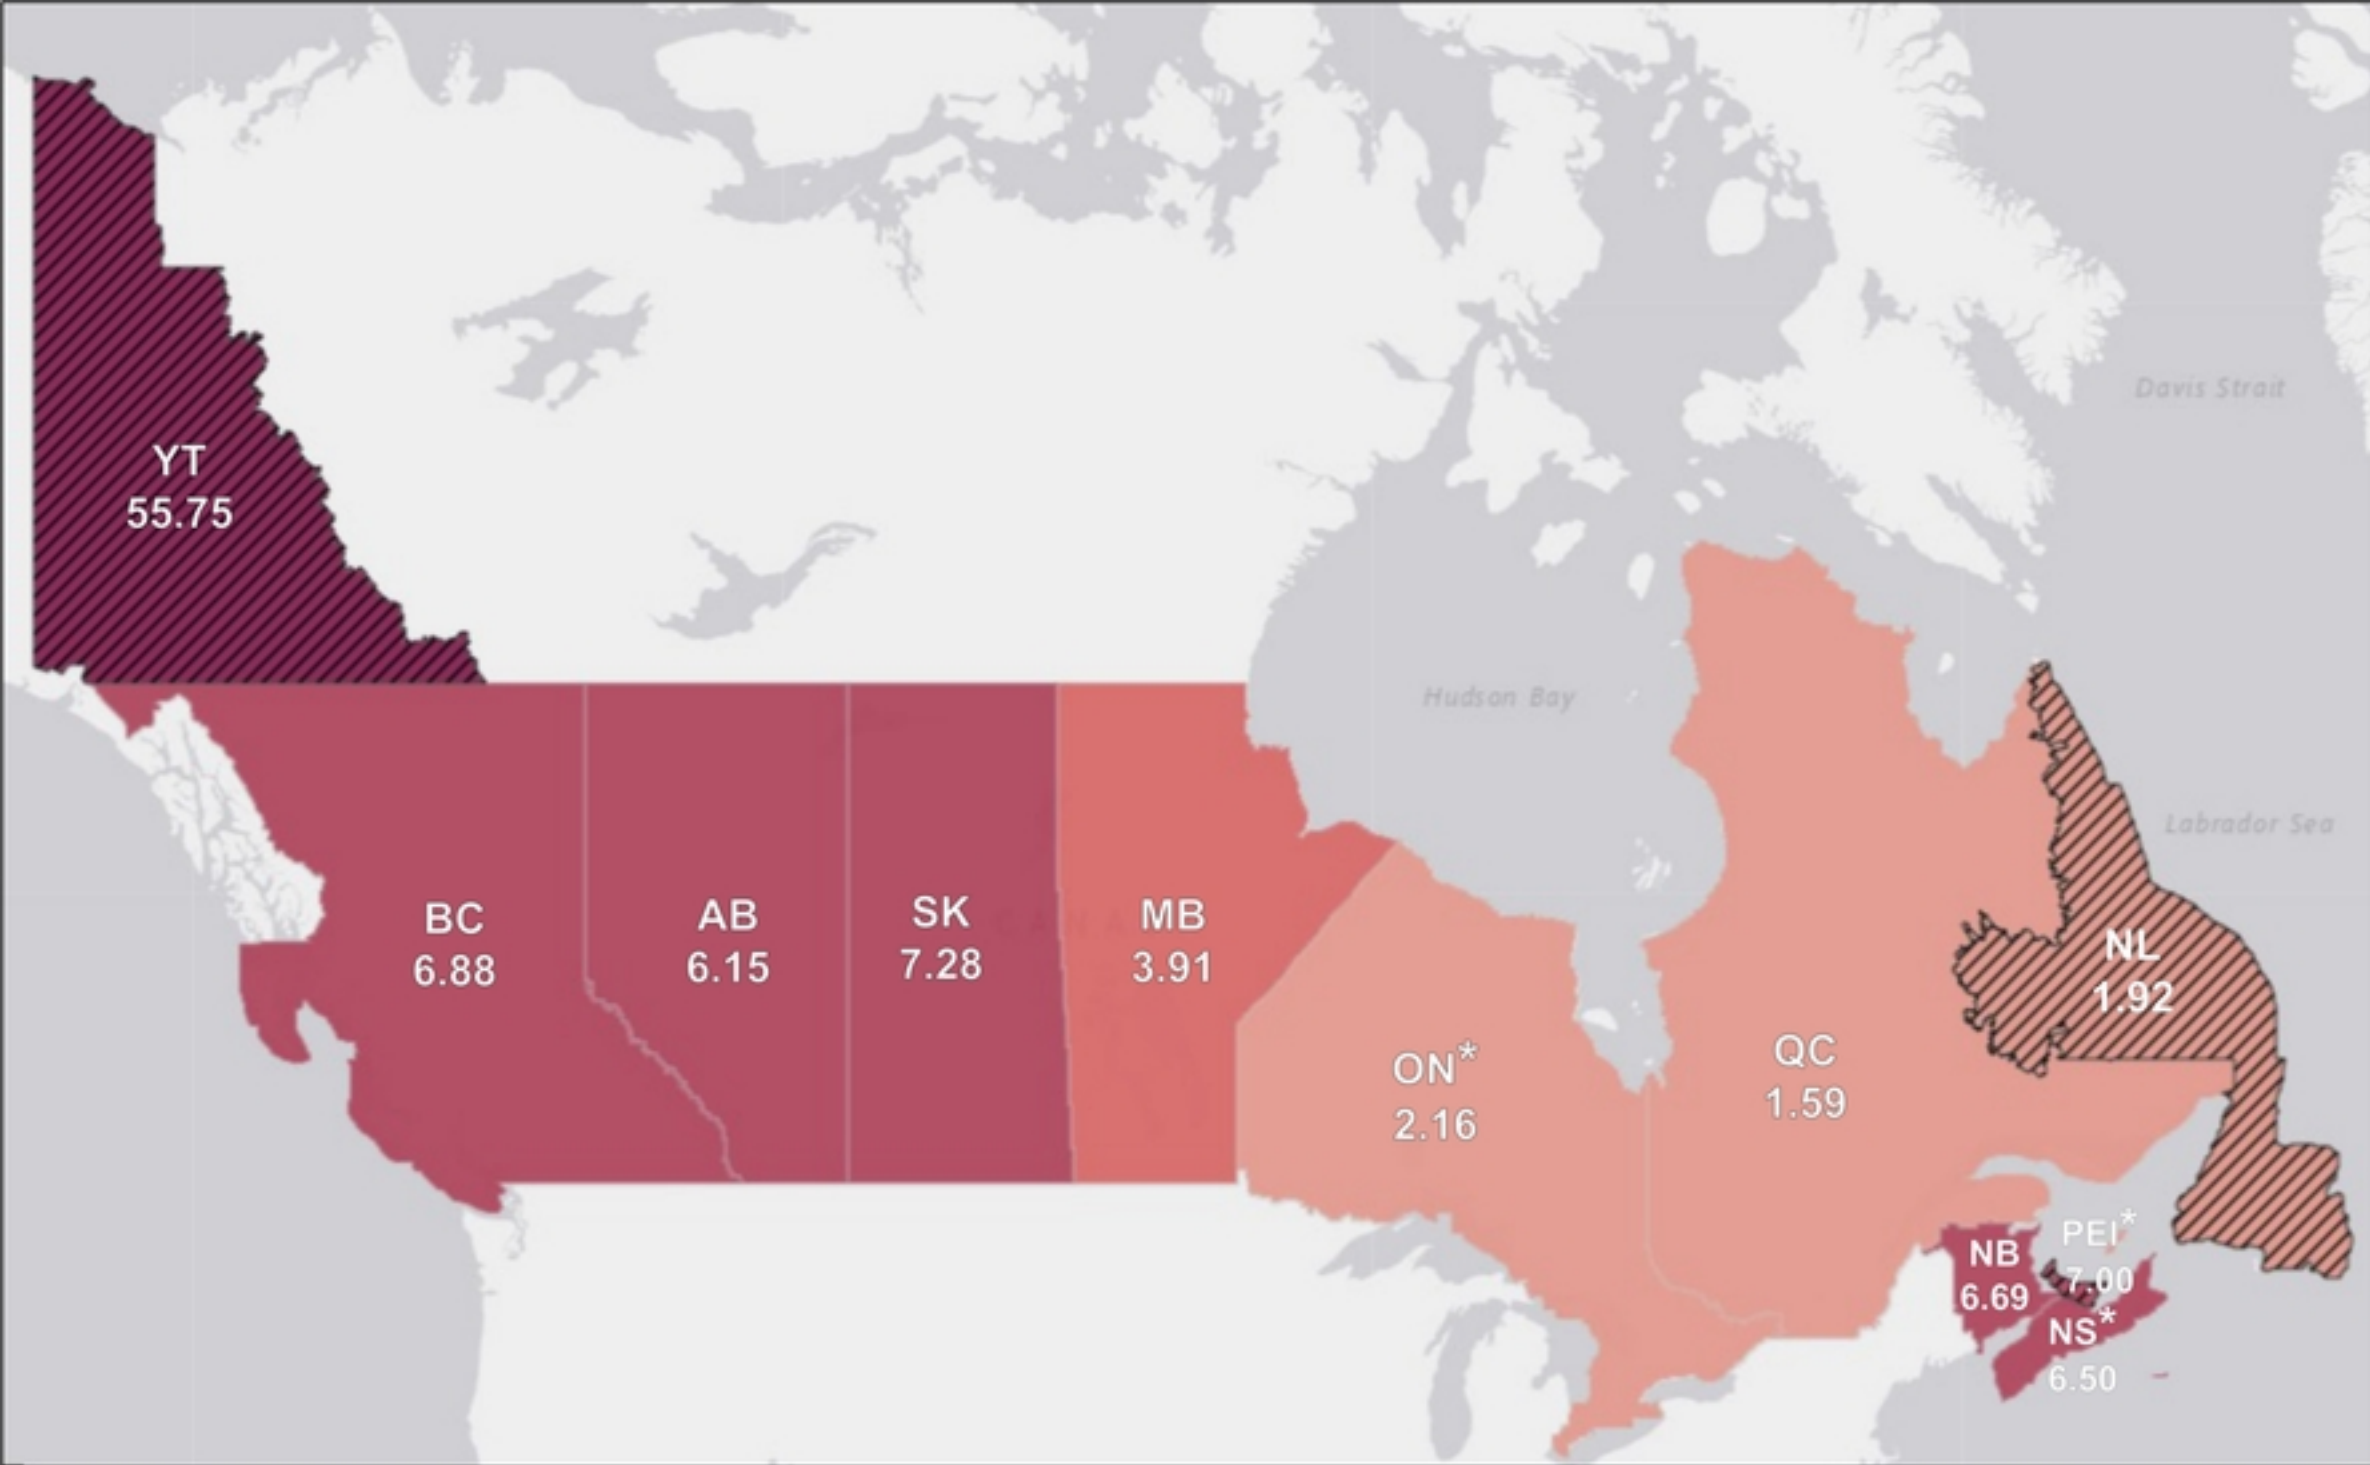

Fig 3

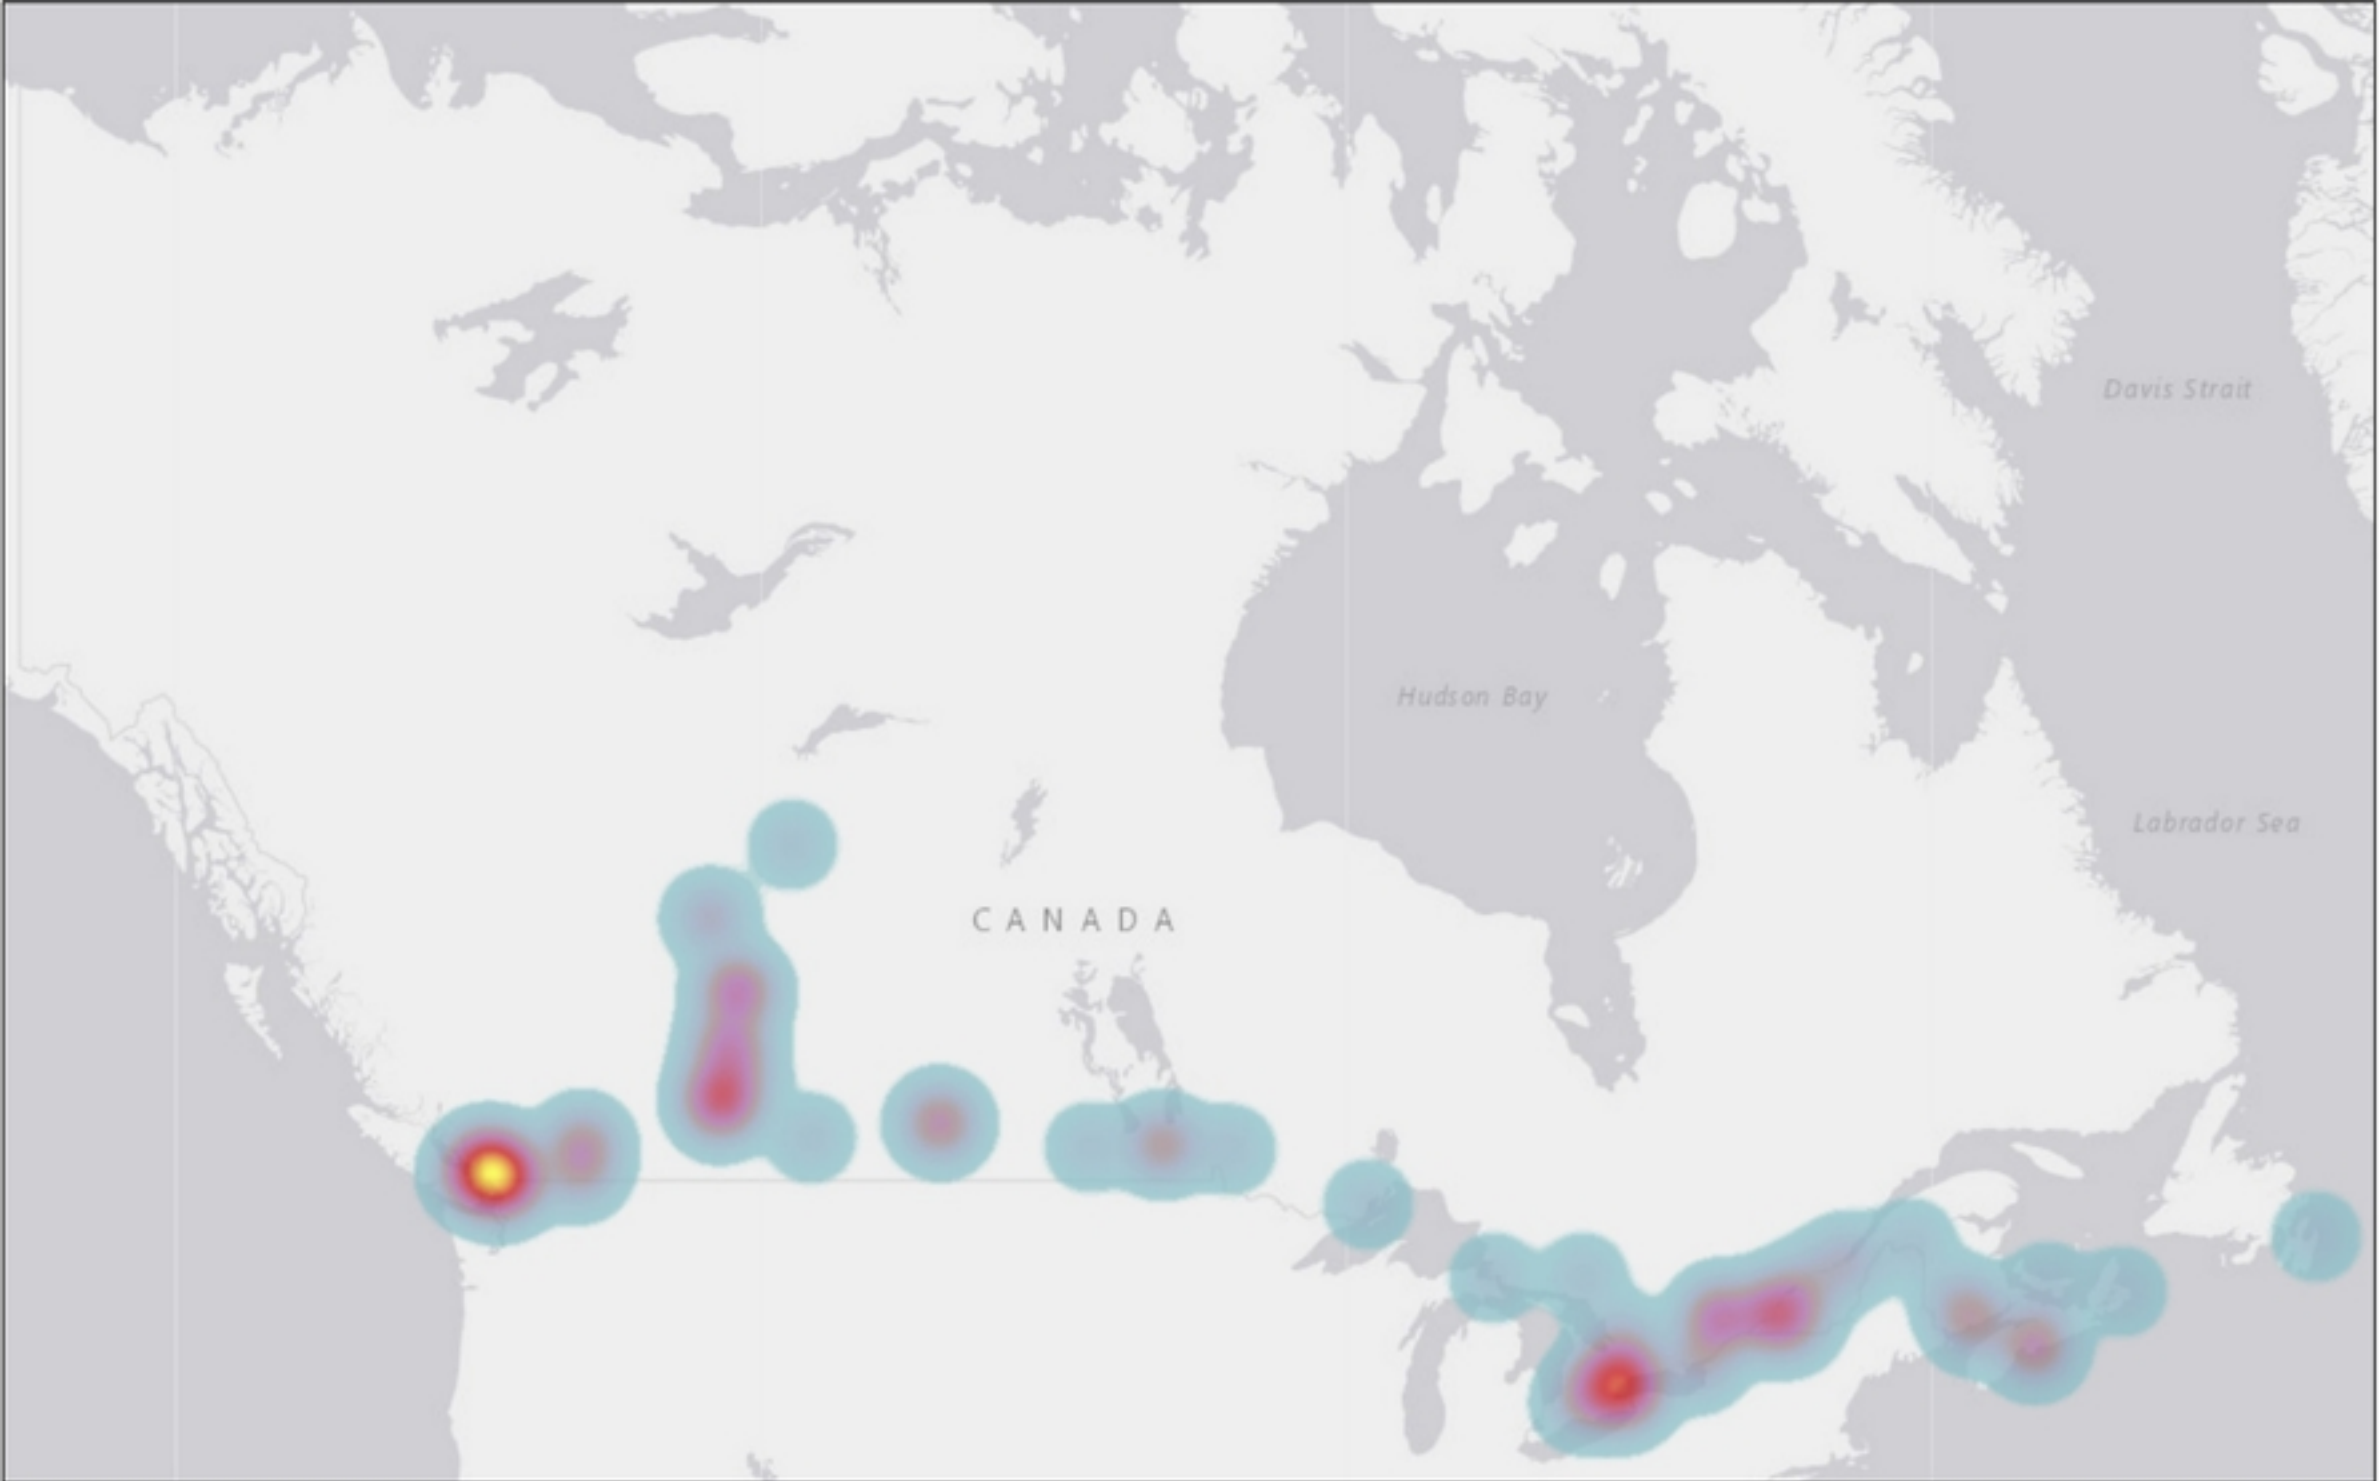

Fig 2
